# Supplementary material
Source: PubMed Central journal article supplement (PMC3149339)
Supplement: supp_M111.220251_jbc.M111.220251-1.pdf [file supp_M111.220251_jbc.M111.220251-1.pdf]

A.

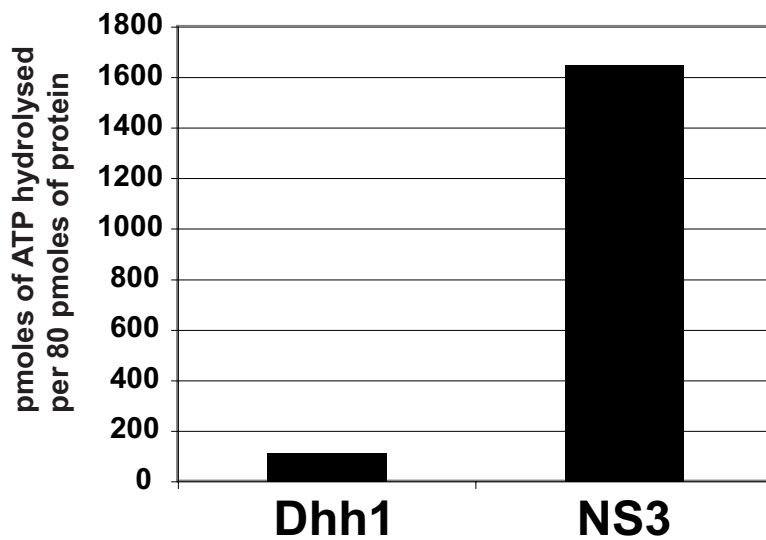

B.

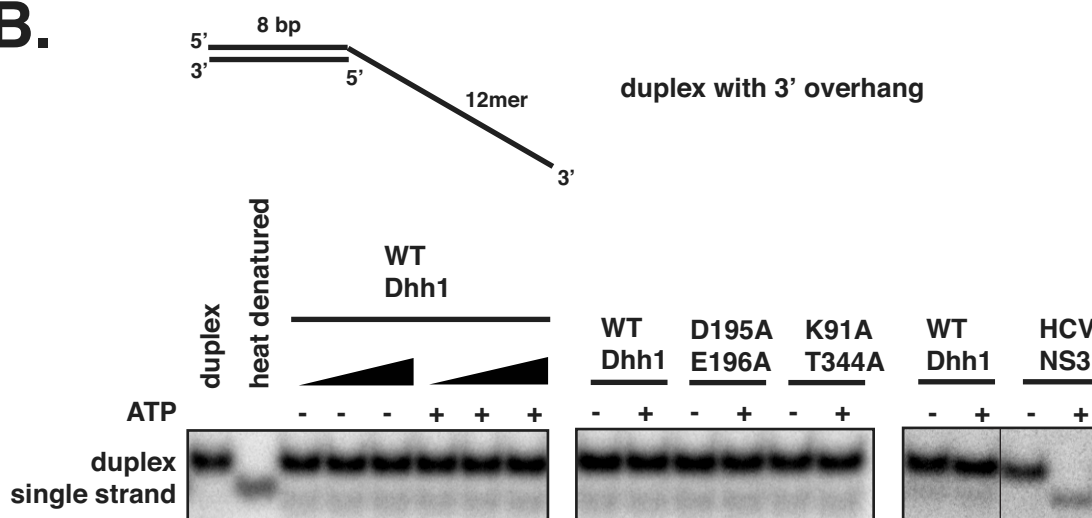

C.

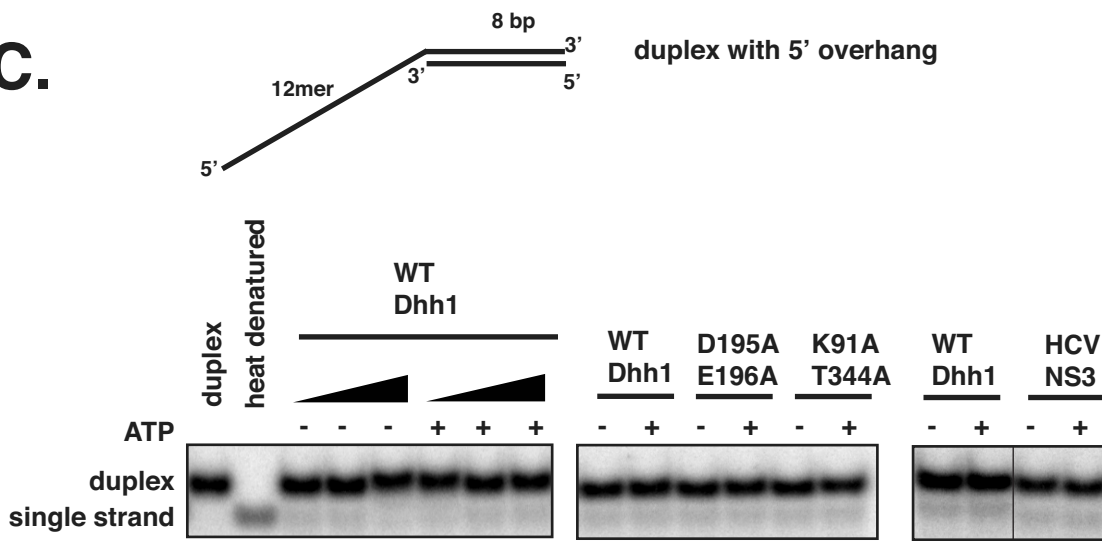

Dhh1

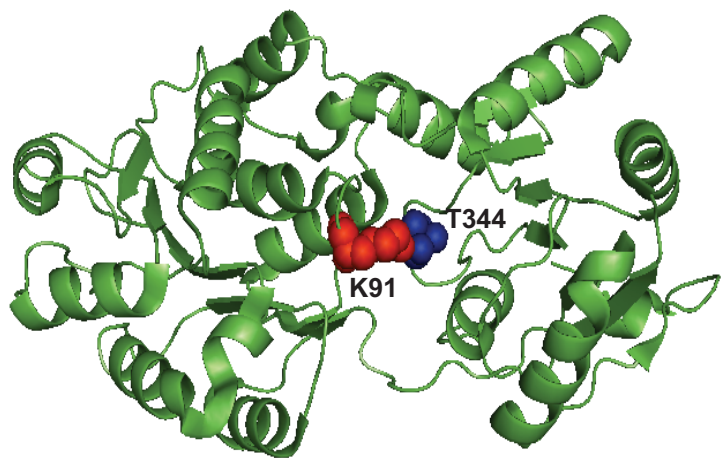

eIF4A

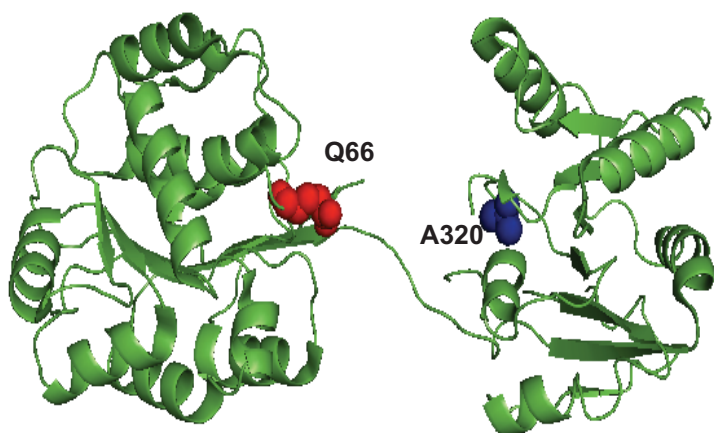

mjDEAD

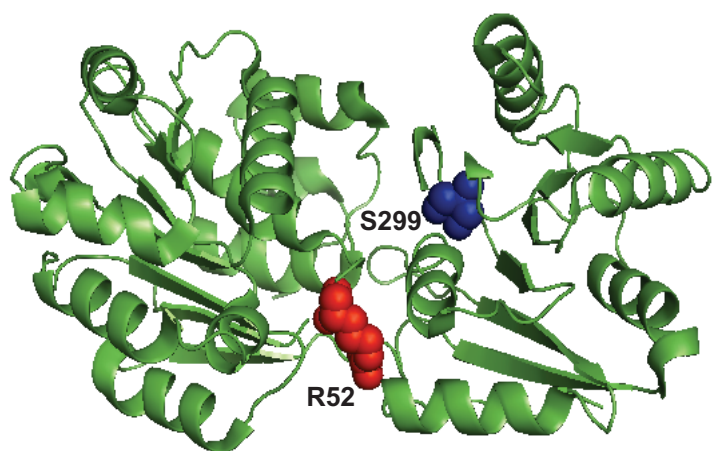

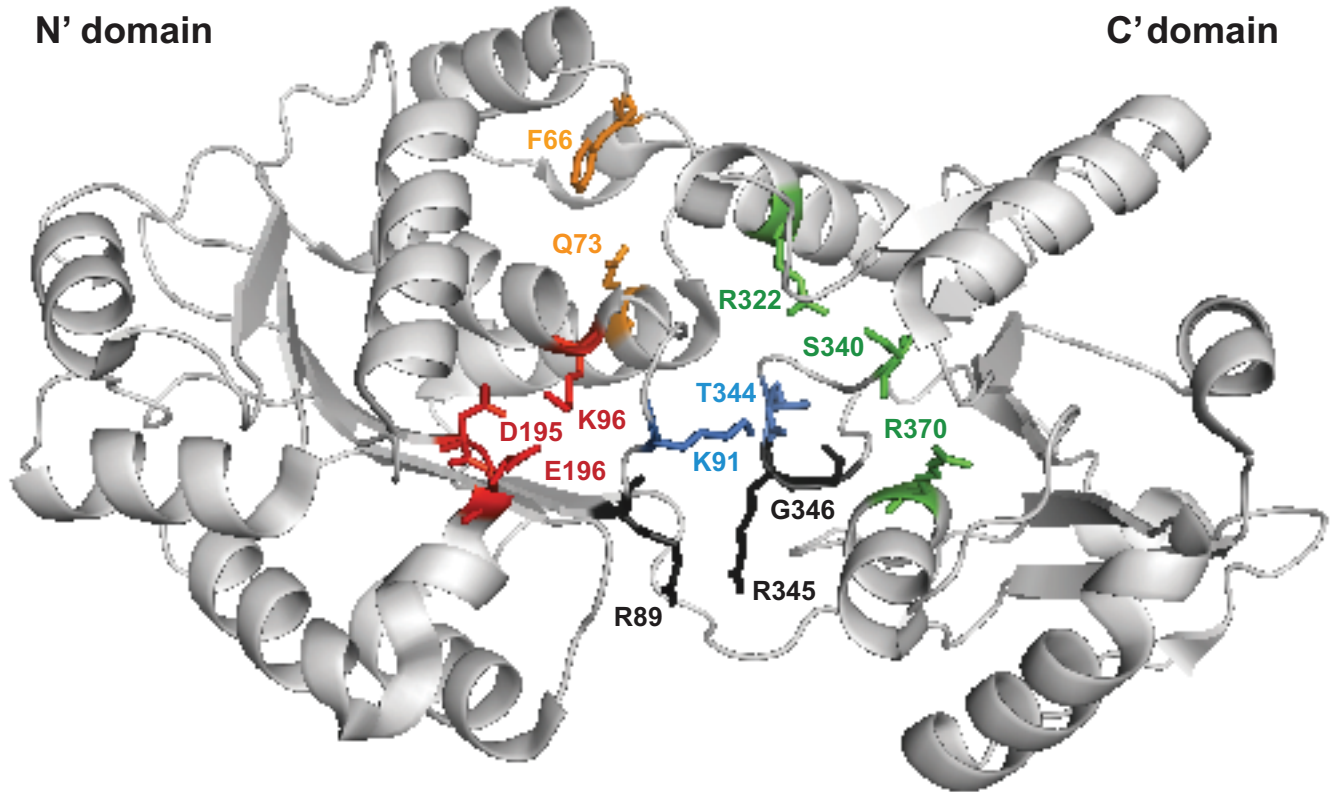

- ATP hydrolysis
- ATP binding
- inter-domain interaction
- RNA binding
- other residues mutated

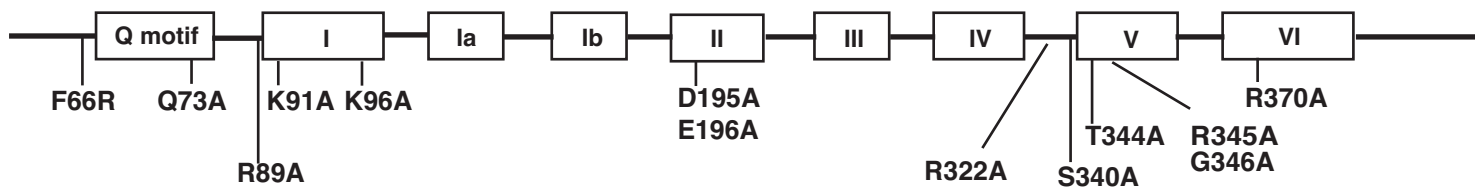

| Strain | Description                        | Genotype                                                               |
|--------|------------------------------------|------------------------------------------------------------------------|
| PH499  | WT                                 | <i>MAT a ade2-101; his3-Δ200; leu2-Δ1; ura3-52; trp1-Δ63; lys2-801</i> |
| YJR148 | DHH1 deletion                      | PH499 with <i>Δdhh1::HIS3</i>                                          |
| JR1429 | Integrated <i>DHH1</i>             | Isogenic to YJR148; <i>DHH1::TRP1</i>                                  |
| JR1430 | Integrated F66R Q73A               | Isogenic to YJR148; <i>dhh1 F66R/Q73A::TRP1</i>                        |
| JR1431 | Integrated D195A E196A             | Isogenic to YJR148; <i>dhh1 D195A/E196A::TRP1</i>                      |
| JR1432 | Integrated K91A T344A              | Isogenic to YJR148; <i>dhh1 K91A/T344A::TRP1</i>                       |
| JR1433 | Integrated R322A S340A             | Isogenic to YJR148; <i>dhh1 R322A/S340A::TRP1</i>                      |
| JR1450 | Integrated <i>DHH1-GFP</i>         | Isogenic to YJR148; <i>DHH1-GFP::KanMx</i>                             |
| JR1451 | Integrated F66R Q73A- <i>GFP</i>   | Isogenic to YJR148; <i>dhh1 F66R/Q73A-GFP::KanMx</i>                   |
| JR1452 | Integrated D195A E196A- <i>GFP</i> | Isogenic to YJR148; <i>dhh1 D195A/ E196A-GFP::KanMx</i>                |
| JR1453 | Integrated K91A T344A- <i>GFP</i>  | Isogenic to YJR148; <i>dhh1 K91A/T344A-GFP::KanMx</i>                  |
| JR1453 | Integrated R322A S340A- <i>GFP</i> | Isogenic to YJR148; <i>dhh1 R322A/S340A-GFP::KanMx</i>                 |
|        |                                    |                                                                        |

Supplemental Table 1.

## Supplemental figure legends

### **Supplementary Figure 1. Comparison of the biochemical activities of Dhh1 and NS3 helicase.**

(A) ATPase activity. ATPase assay was performed at 30 °C for 60 minutes using 4 μM of Dhh1 and HCV NS3 helicase and 20 μg poly (U) RNA. The activity was plotted as pmol of ATP hydrolyzed per 80 pmol of protein. Details are found in the methods section of the manuscript. (B) Helicase assays were carried out using 2 nM [<sup>32</sup>P]-labeled 3' and 5' overhang substrates (B and C). Dhh1 was titrated into the assay from 0 to 1 μM (left side). Wild type Dhh1 and mutants were analyzed at 1 μM (middle). The NS3 protein, a helicase from Hepatitis C virus was analyzed as control (0.5 μM). Reactions were performed at 30°C. The trapping strand was included in the reactions (8-mer RNA that is complementary to the 8 bp displaced strand). Reactions were quenched after 15 minutes by the addition of EDTA to 100 mM and SDS to 0.33%. Products were resolved on native polyacrylamide gels.

### **Supplementary Figure 2: Comparison of crystal structures of Dhh1 with that of eIF4A and mjDEAD.**

The crystal structures of Dhh1 (PDB id. 1S2M), *S. cerevisiae* eIF4A (PDB id. 1FUU) and *M. janaschii* mjDEAD (PDB id. 1HV8) were analyzed using PyMOL. The positions of K91 and T344 are highlighted in the crystal structure of Dhh1. The position of orthologous residues in eIF4A and mjDEAD are highlighted in the respective crystal structures. K91 in Dhh1 is replaced by Q66 in eIF4A and R52 in mjDEAD, whereas T344 in the C' domain of Dhh1 is replaced by A320 in eIF4A and S299 in mjDEAD. Unlike Dhh1, eIF4A and mjDEAD lack interdomain interactions.

### **Supplementary Figure 3: Location of the mutants on the crystal structure of Dhh1.**

The crystal structure of Dhh1 was analyzed using PyMOL software (PDB id. 1S2M). The positions of amino acid residues that were mutated to alanines are color coded as follows: residues involved in ATP hydrolysis (K96, D195, E196 and R373) are highlighted in red, (F66 and Q73) involved in ATP binding are highlighted in orange, residues involved in interdomain interactions (K91 and T344) are highlighted in blue, residues that affect RNA binding (R322, S340 and R370), are shown in green and other residues (R89, R345 and G346) are shown in black. A schematic of the helicase domain structure of Dhh1 is shown below.
